# Supplementary material for: Highly flexible hybrid devices enabled by Ag-decorated ZnCo2O4 electrodes
Source: Royal Society of Chemistry journal article supplement (doi:10.1039/d4ra05871b), 2024-01-01
Supplement: d4ra05871b1.pdf [file d4ra05871b1.pdf]

## Supporting Information

### Highly flexible hybrid devices enabled by Ag decorated $\text{ZnCo}_2\text{O}_4$ electrodes

Xingjie Sun<sup>a</sup>, Wei-chao Zhang<sup>b</sup>, Xiang Wu<sup>a,\*</sup>

<sup>a</sup>School of Materials Science and Engineering, Shenyang University of Technology,  
Shenyang 110870, P. R. China

<sup>b</sup>Key Laboratory of Engineering Dielectrics and Its Application, Ministry of  
Education, Harbin University of Science and Technology, Harbin 150080, P. R. China

\*Corresponding addresses: [wuxiang05@sut.edu.cn](mailto:wuxiang05@sut.edu.cn)

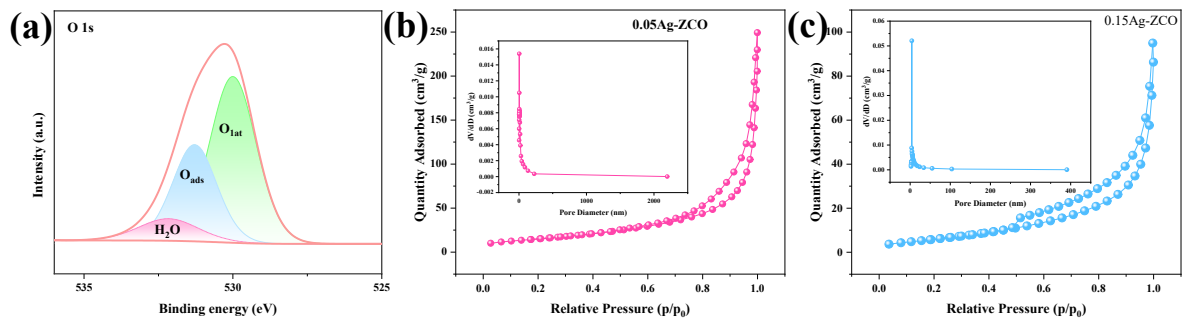

Fig. S1 (a) XPS spectra of O 1s of 0.1Ag-ZCO materials (b)  $N_2$  adsorption-desorption isotherms and corresponding pore size distribution curves of 0.05Ag-ZCO (c) 0.15Ag-ZCO

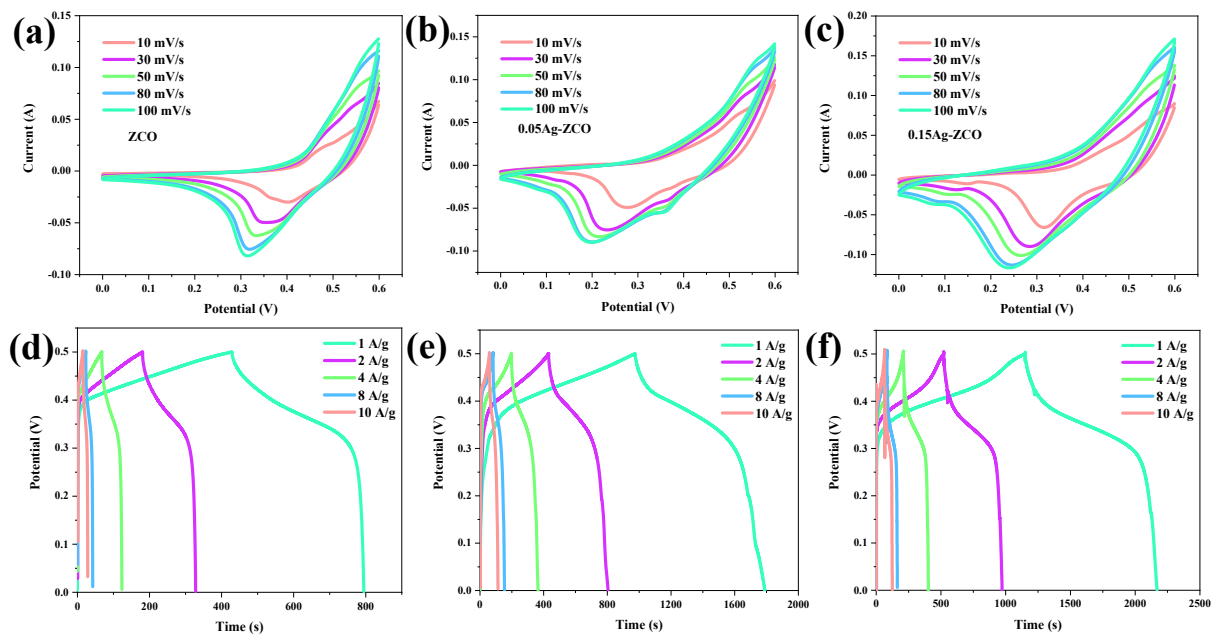

Fig. S2 CV and GCD curves of ZCO (a and d) 0.05Ag-ZCO (b and e) 0.15Ag-ZCO (c and f) samples

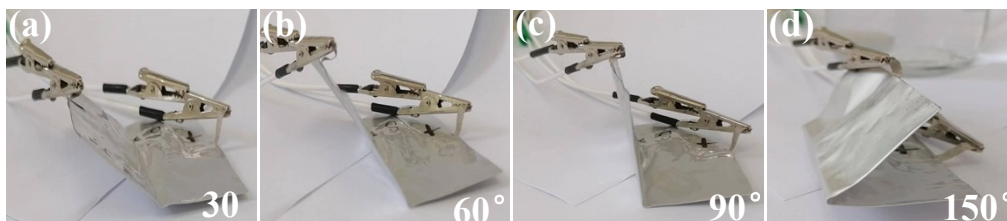

Fig. S3 Digital photographs of folded device

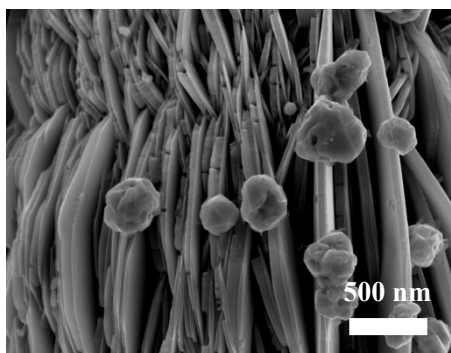

Fig. S4 Electrode morphology after cycling
